# Supplementary material for: Phage Therapy against Staphylococcus aureus: Selection and Optimization of Production Protocols of Novel Broad-Spectrum Silviavirus Phages
Source: MDPI journal article supplement (doi:10.3390/pharmaceutics14091885), 2022-09-06
Supplement: s1 [file s1]

A.

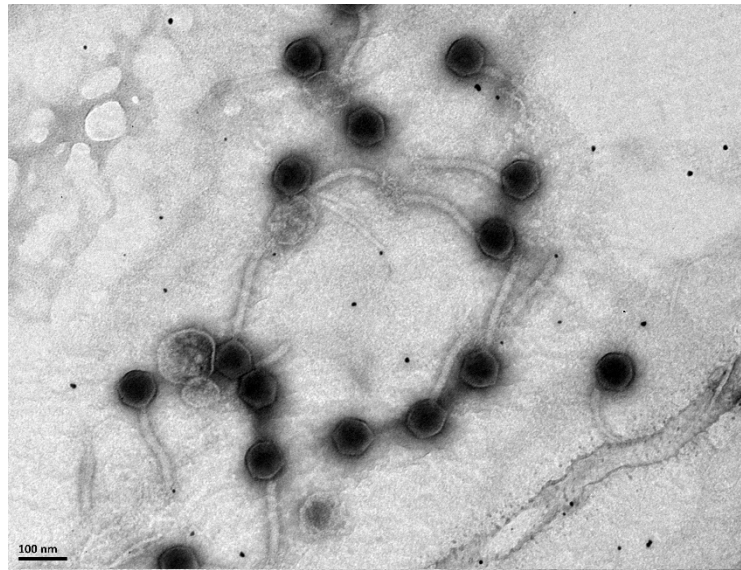

B.

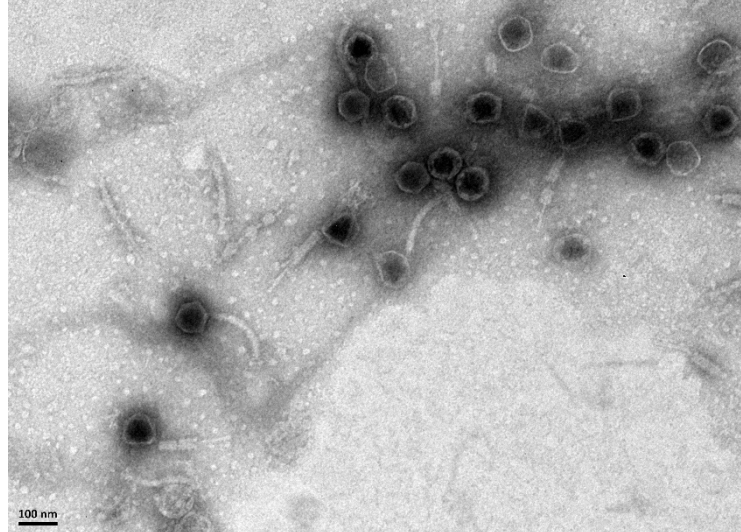

C.

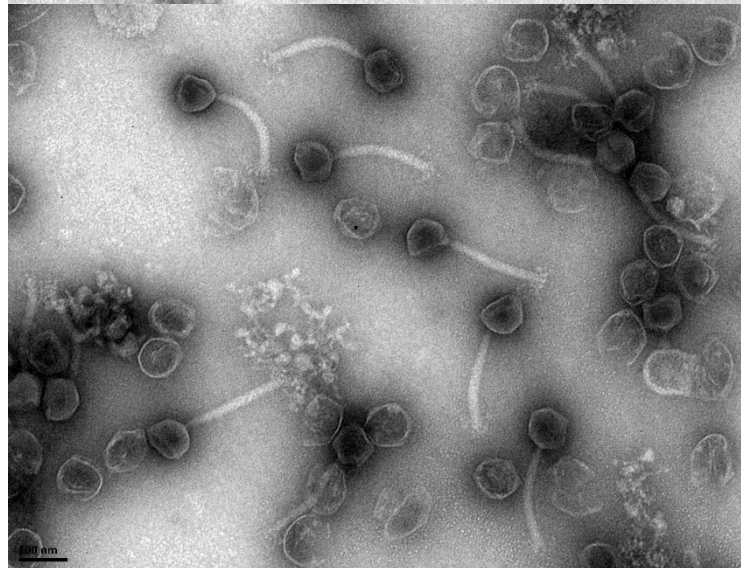

**Figure S1. Morphology in TEM of *Silviavirus* anti-*Staphylococcus aureus* phages.**  
(A) V1SA19; (B) V1SA20; (C) V1SA22.
